# Supplementary material
Source: PubMed Central journal article supplement (PMC1472497)

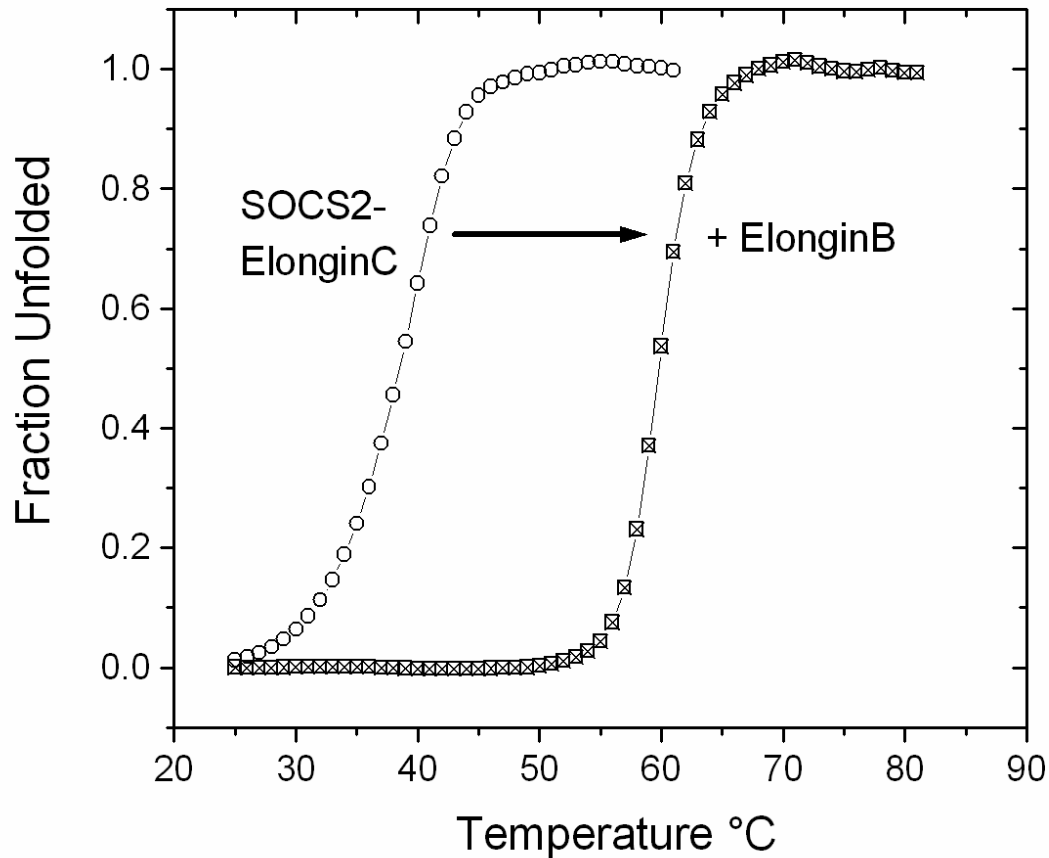

Supplement: pnas_0601638103_1.pdf [file pnas_0601638103_1.pdf]

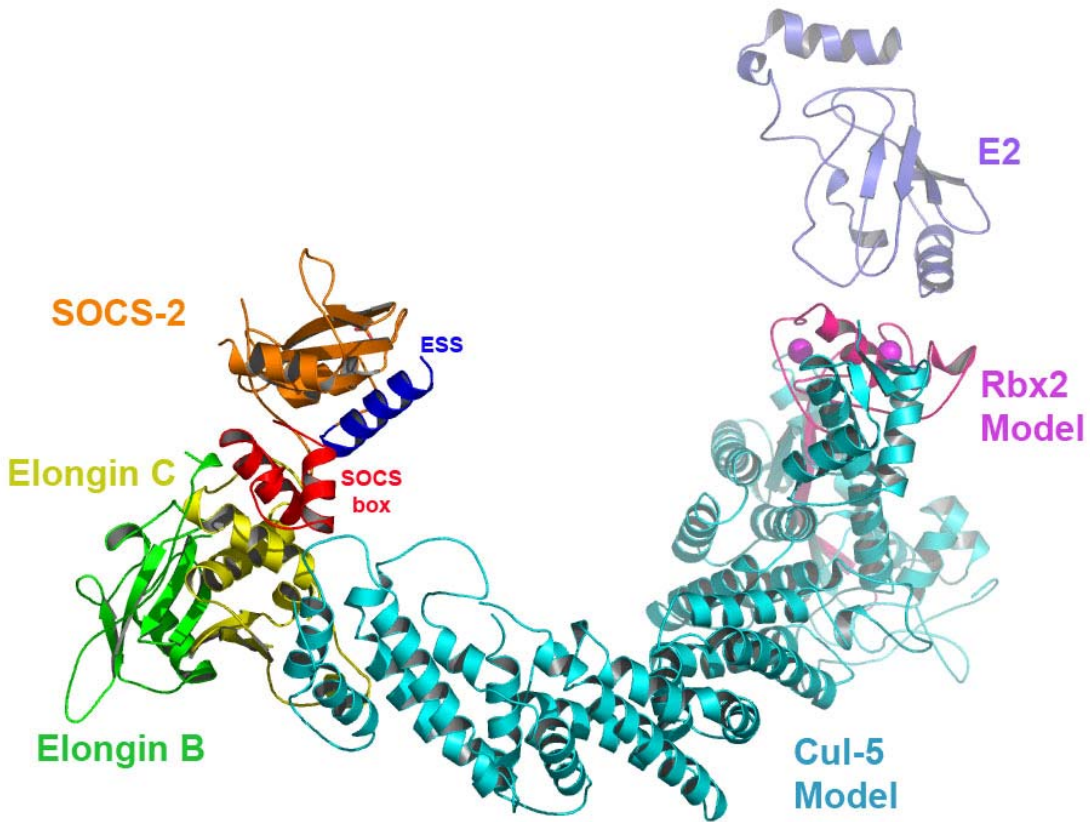

Supplement: pnas_0601638103_2.pdf [file pnas_0601638103_2.pdf]

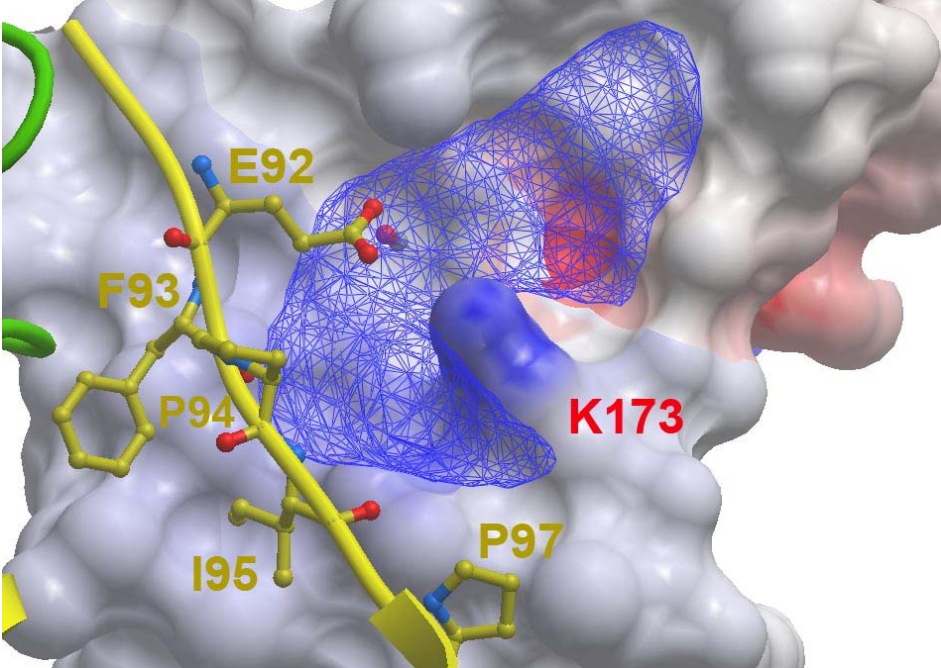

Supplement: pnas_0601638103_3.pdf [file pnas_0601638103_3.pdf]
